# Supplementary material for: Growth factor independent-1 Maintains Notch1-Dependent Transcriptional Programming of Lymphoid Precursors
Source: PLoS Genet. 2013 Sep 12;9(9):e1003713. doi: 10.1371/journal.pgen.1003713 (PMC3772063; doi:10.1371/journal.pgen.1003713)
Supplement: Table S2 — All genes that demonstrated a +/−2 fold change between ICN-transduced Gfi1f/f and Gfi1Δ/Δ CFU were examined for enrichment of Gene Ontology (GO) Cellular Components. The “Cell Surface” (GO:0009986) was the most significantly enriched term with a p-value of 2.49×10−16. The gene names, gene symbols and fold change between ICN-transduced Gfi1f/f and Gfi1Δ/Δ CFU are shown sorted by fold change. The color-coded key demonstrates the level deregulation in ICN-transduced Gfi1Δ/Δ CFU. (XLSX) [file pgen.1003713.s004.xlsx]

## Sheet: GO Cell Surface
Gene Name	Gene Symbol	Fold Change
sulfatase 2	Sulf2	7.771		>10.00
tumor necrosis factor (ligand) superfamily, member 4	Tnfsf4	4.726		>5.00-9.99
CD200 receptor 1-like	Cd200r4	3.893		>3.00-4.99
platelet-derived growth factor alpha polypeptide	Pdgfa	3.681		>2.00-2.99
CD93 molecule	Cd93	2.751		<-2.00-2.99
CD59 molecule, complement regulatory protein	Cd59b	2.691		<-3.00-4.99
von Willebrand factor	Vwf	2.503		<-5.0-9.99
alanyl (membrane) aminopeptidase	Anpep	2.498		<-10.00
layilin	Layn	2.448
membrane-spanning 4-domains, subfamily A, member 2	Ms4a2	2.382
reticulon 4 receptor	Rtn4r	2.327
membrane protein, palmitoylated 3 (MAGUK p55 subfamily member 3)	Mpp3	2.205
dystrophin	Dmd	2.141
interleukin 1 receptor-like 1	Il1rl1	2.066
plasminogen activator, urokinase	Plau	2.01
CD48 molecule	Cd48	-2.007
epithelial cell adhesion molecule	Epcam	-2.027
integrin, alpha L (antigen CD11A (p180), lymphocyte function-associated antigen 1; alpha polypeptide)	Itgal	-2.035
C-type lectin domain family 2, member D	Clec2g	-2.036
delta-like 1 homolog (Drosophila)	Dlk1	-2.043
lymphocyte-activation gene 3	Lag3	-2.076
heparin-binding EGF-like growth factor	Hbegf	-2.088
activated leukocyte cell adhesion molecule	Alcam	-2.102
CD86 molecule	Cd86	-2.106
apolipoprotein E	Apoe	-2.117
neuronal cell adhesion molecule	Nrcam	-2.128
AXL receptor tyrosine kinase	Axl	-2.169
programmed cell death 1	Pdcd1	-2.187
G protein-coupled receptor 125	Gpr125	-2.196
vascular endothelial growth factor A	Vegfa	-2.218
reticulon 4 receptor-like 1	Rtn4rl1	-2.233
integrin, alpha 1	Itga1	-2.245
tumor necrosis factor receptor superfamily, member 9	Tnfrsf9	-2.277
nucleotide-binding oligomerization domain containing 2	Nod2	-2.309
integrin, beta 3 (platelet glycoprotein IIIa, antigen CD61)	Itgb3	-2.483
semaphorin 7A, GPI membrane anchor (John Milton Hagen blood group)	Sema7a	-2.558
proprotein convertase subtilisin/kexin type 9	Pcsk9	-2.688
elastase, neutrophil expressed	Elane	-2.719
prominin 1	Prom1	-2.721
solute carrier family 11 (proton-coupled divalent metal ion transporters), member 1	Slc11a1	-2.747
integrin, alpha 6	Itga6	-2.761
CD1d molecule	Cd1d1	-2.78
activin A receptor, type IIB	Acvr2b	-2.854
Fc fragment of IgG, low affinity IIIa, receptor (CD16a)	Fcgr4	-2.871
sodium channel, non-voltage-gated 1 alpha subunit	Scnn1a	-2.964
transforming growth factor, beta 3	Tgfb3	-3.298
thrombospondin, type I, domain containing 1	Thsd1	-3.318
chemokine (C-X3-C motif) ligand 1	Cx3cl1	-3.324
cadherin 1, type 1, E-cadherin (epithelial)	Cdh1	-3.367
interleukin 6 receptor	Il6ra	-3.44
integrin, beta 2 (complement component 3 receptor 3 and 4 subunit)	Itgb2	-3.448
CD83 molecule	Cd83	-3.453
beta-site APP-cleaving enzyme 1	Bace1	-3.493
integrin, alpha M (complement component 3 receptor 3 subunit)	Itgam	-3.521
5'-nucleotidase, ecto (CD73)	Nt5e	-3.561
aquaporin 11	Aqp11	-3.848
CD6 molecule	Cd6	-3.876
integrin, alpha 4 (antigen CD49D, alpha 4 subunit of VLA-4 receptor)	Itga4	-3.948
solute carrier organic anion transporter family, member 3A1	Slco3a1	-4.003
colony stimulating factor 1 receptor	Csf1r	-4.109
poliovirus receptor-related 2 (herpesvirus entry mediator B)	Pvrl2	-4.208
lipoprotein lipase	Lpl	-4.365
dipeptidyl-peptidase 4	Dpp4	-4.693
chemokine (C-X-C motif) receptor 2	Cxcr2	-4.939
chemokine (C-C motif) receptor 4	Ccr4	-5.302
CD79b molecule, immunoglobulin-associated beta	Cd79b	-5.798
egf-like module containing, mucin-like, hormone receptor-like 1	Emr1	-5.96
CD74 molecule, major histocompatibility complex, class II invariant chain	Cd74	-6.353
receptor (G protein-coupled) activity modifying protein 1	Ramp1	-6.717
cathepsin L2	Ctsl	-6.988
interleukin 17 receptor B	Il17rb	-7.198
CD24 molecule	Cd24a	-7.265
chemokine (C-X-C motif) receptor 4	Cxcr4	-7.59
interleukin 2 receptor, alpha	Il2ra	-7.939
chemokine (C-X-C motif) ligand 10	Cxcl10	-8.175
integrin, alpha X (complement component 3 receptor 4 subunit)	Itgax	-8.209
amyloid beta (A4) precursor protein	App	-8.211
major histocompatibility complex, class II, DQ beta 1	H2-Ab1	-8.339
major histocompatibility complex, class II, DQ alpha 1	H2-Aa	-8.936
tumor necrosis factor receptor superfamily, member 1A	Tnfrsf1a	-9.043
CD5 molecule	Cd5	-9.249
CD14 molecule	Cd14	-9.403
chemokine (C-C motif) receptor 7	Ccr7	-9.51
coagulation factor X	F10	-9.65
C-type lectin domain family 7, member A	Clec7a	-10.261
thrombospondin 1	Thbs1	-10.316
major histocompatibility complex, class II, DR beta 1	H2-Eb1	-11.177
selectin L	Sell	-11.662
toll-like receptor 2	Tlr2	-12.061
Thy-1 cell surface antigen	Thy1	-22.28
